# Supplementary material for: Phylogeography of Dictyota fasciola and Dictyota mediterranea (Dictyotales, Phaeophyceae): unexpected patterns on the Atlantic-Mediterranean marine transition and taxonomic implications
Source: PeerJ journal article supplement (doi:10.7717/peerj.6916), 2019-05-16

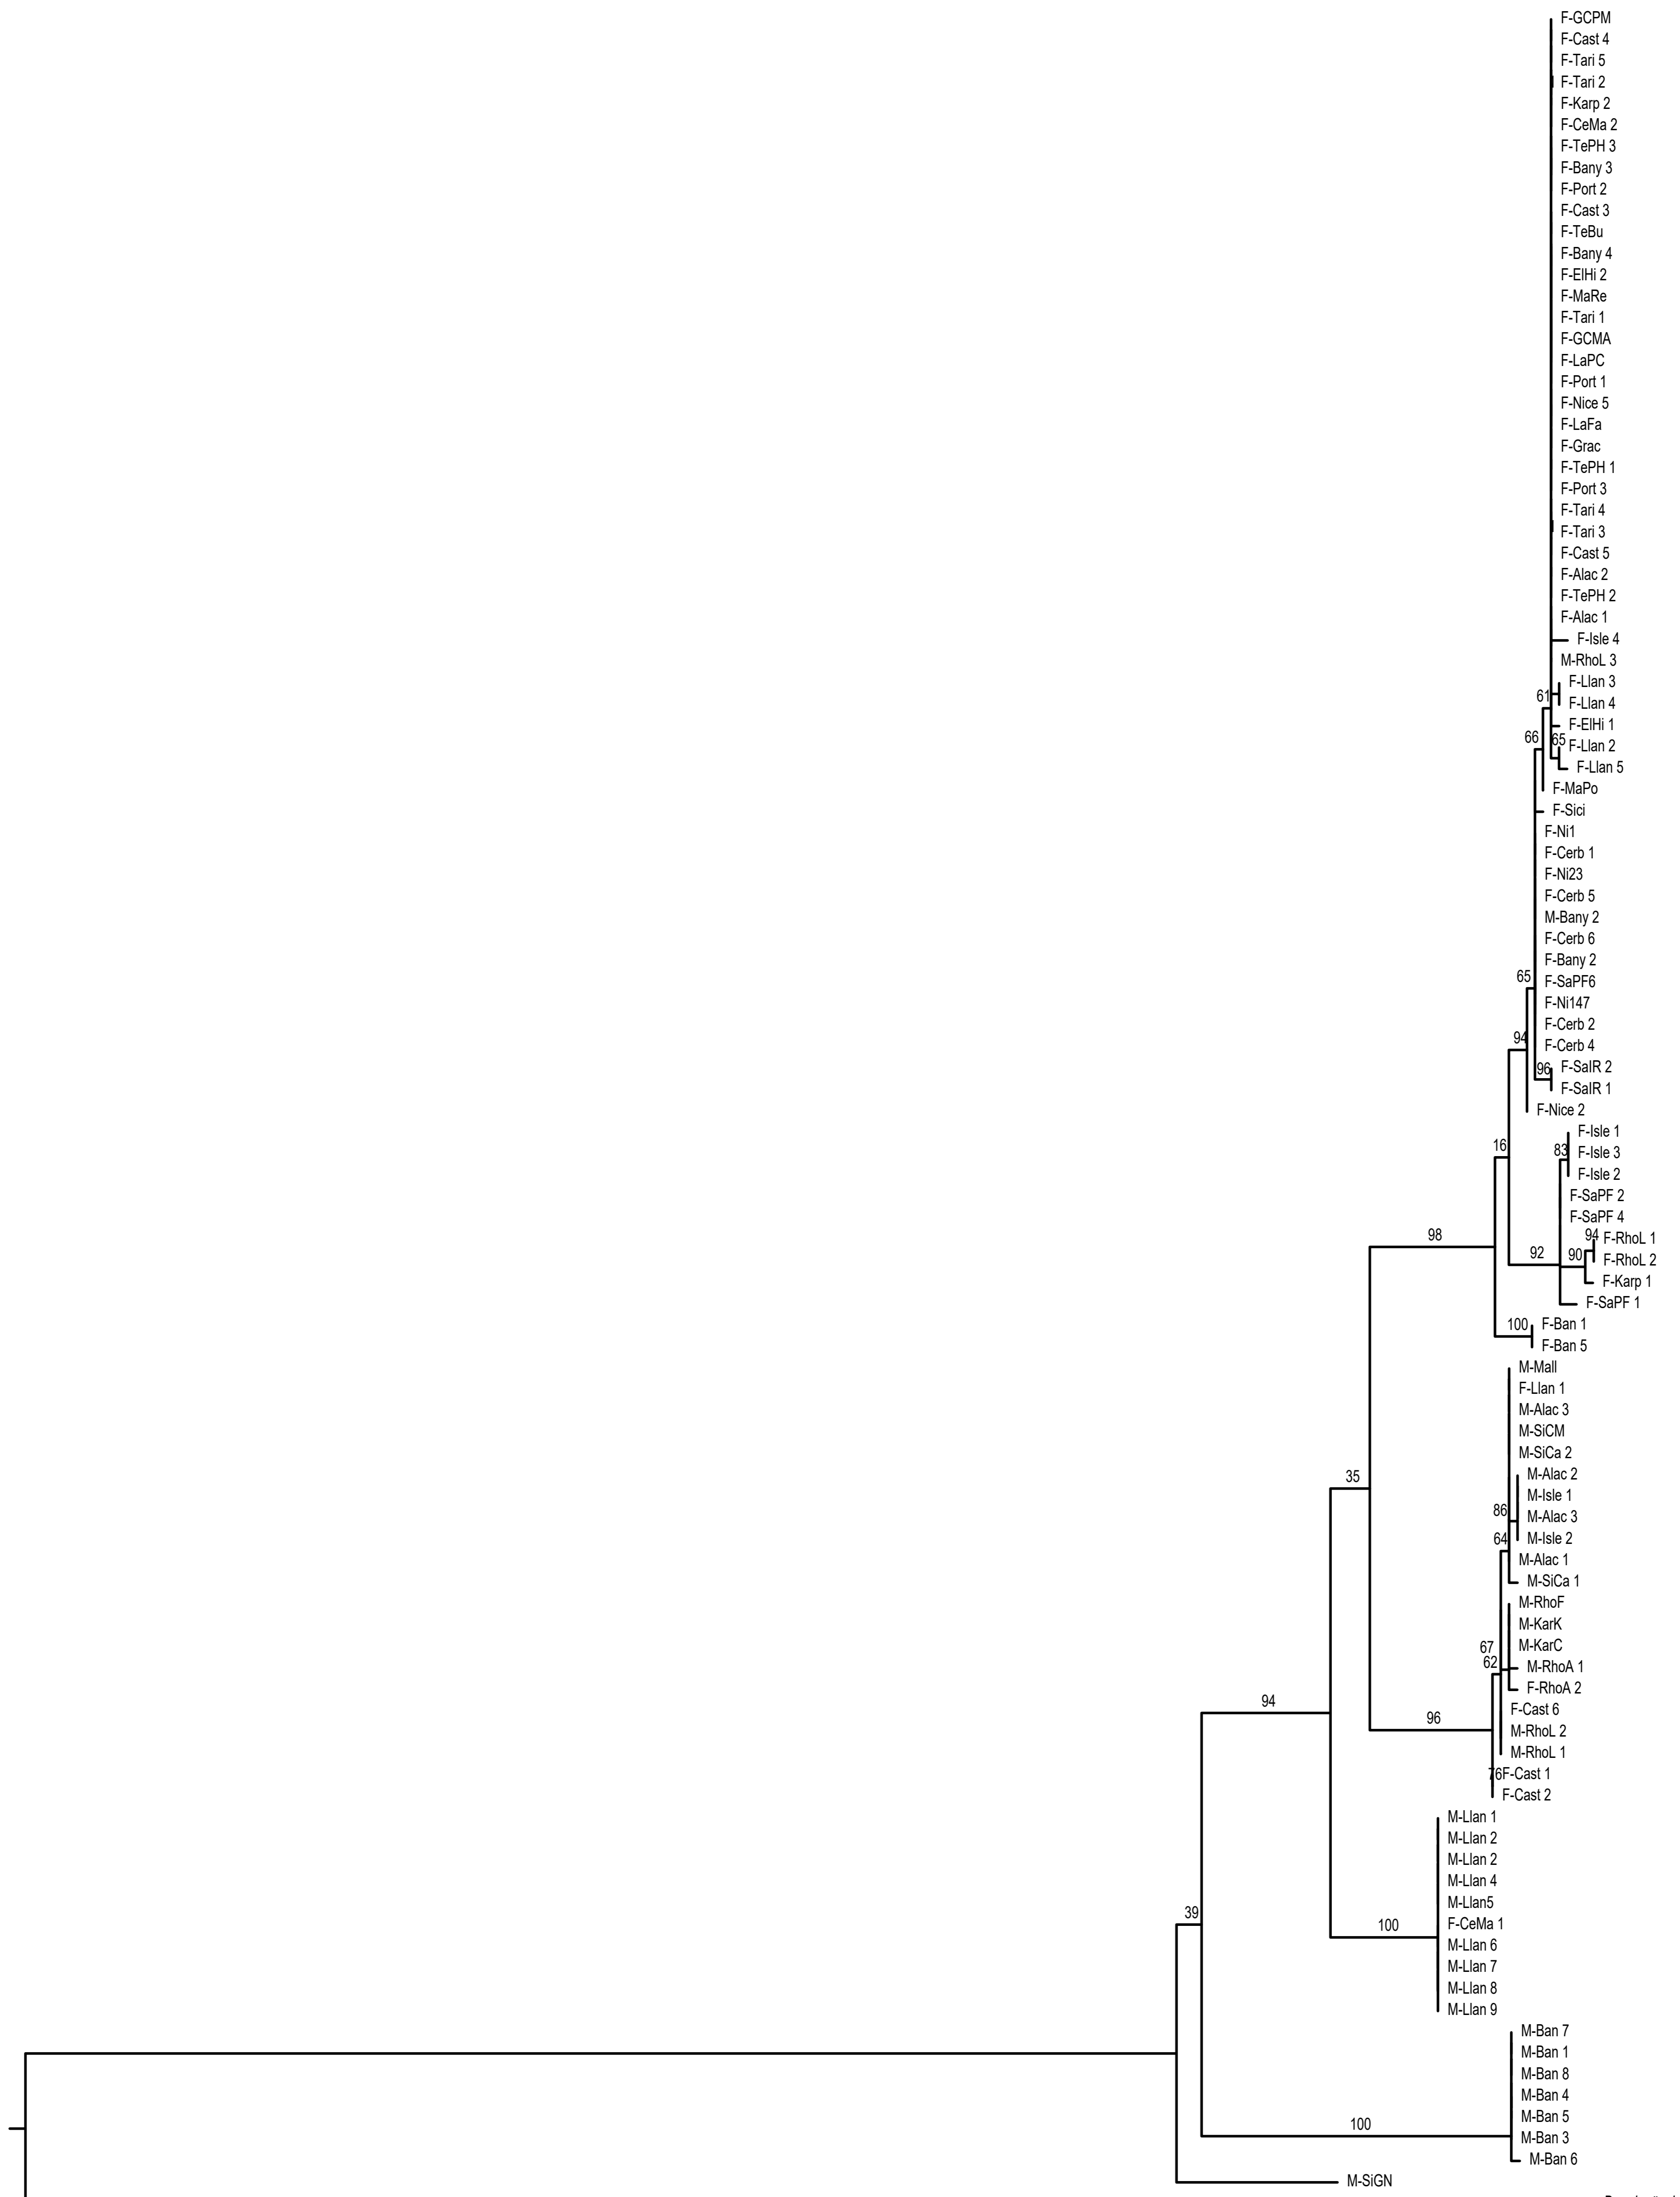

Supplement: Fig_S1_arbre_cox1_RAxML_bipartitions_edited.pdf [file Fig_S1_arbre_cox1_RAxML_bipartitions_edited.pdf]
